# Supplementary material for: Spatially dependent Intensity-Duration-Frequency curves to support the design of civil infrastructure systems
Source: Copernicus journal article supplement (doi:10.5194/hess-2018-393), 2018-09-04
Supplement: Supplementary file 1 [file hess-2018-393-supplement.pdf]

3 **Spatially dependent Intensity-Duration-Frequency curves to support the design of civil infrastructure systems**

4 **Phuong Dong Le<sup>1,2</sup>, Michael Leonard<sup>1</sup>, Seth Westra<sup>1</sup>**

5 *<sup>1</sup>School of Civil, Environmental and Mining Engineering, University of Adelaide, Adelaide, South Australia, Australia*

6 *<sup>2</sup>Thuyloi University, Hanoi, Vietnam*

7 *Email: [phuongdong.le@adelaide.edu.au](mailto:phuongdong.le@adelaide.edu.au)*

8  
9  
10 **Contents of this file**

11 Introduction  
12 Fig. S1 to Fig. S6  
13  
14

15  
16 **Introduction**

17 This file contains the plots for the simulated areal reduction factors (ARFs) for rainfall of 36 hr and 9 hr durations for the case study (Fig. S1 and Fig.  
18 S2); the plots for details of the hydrological models for the Nambucca (upper) catchment and Warrell Creek catchment (Fig. S3), and the Deep Creek  
19 catchment (Fig. S4); and the QQ plots for the estimate of marginal distribution GPD for rainfall of 36 hr and 9 hr durations for all rain gauges in the  
20 case study (Fig. S5 and Fig. S6). Each QQ plot shows the theoretical quantiles vs. sample quantiles (dot points) with 95% confidence intervals (black  
21 dashed lines).

22

# Simulated ARFs for 36 hr rainfall

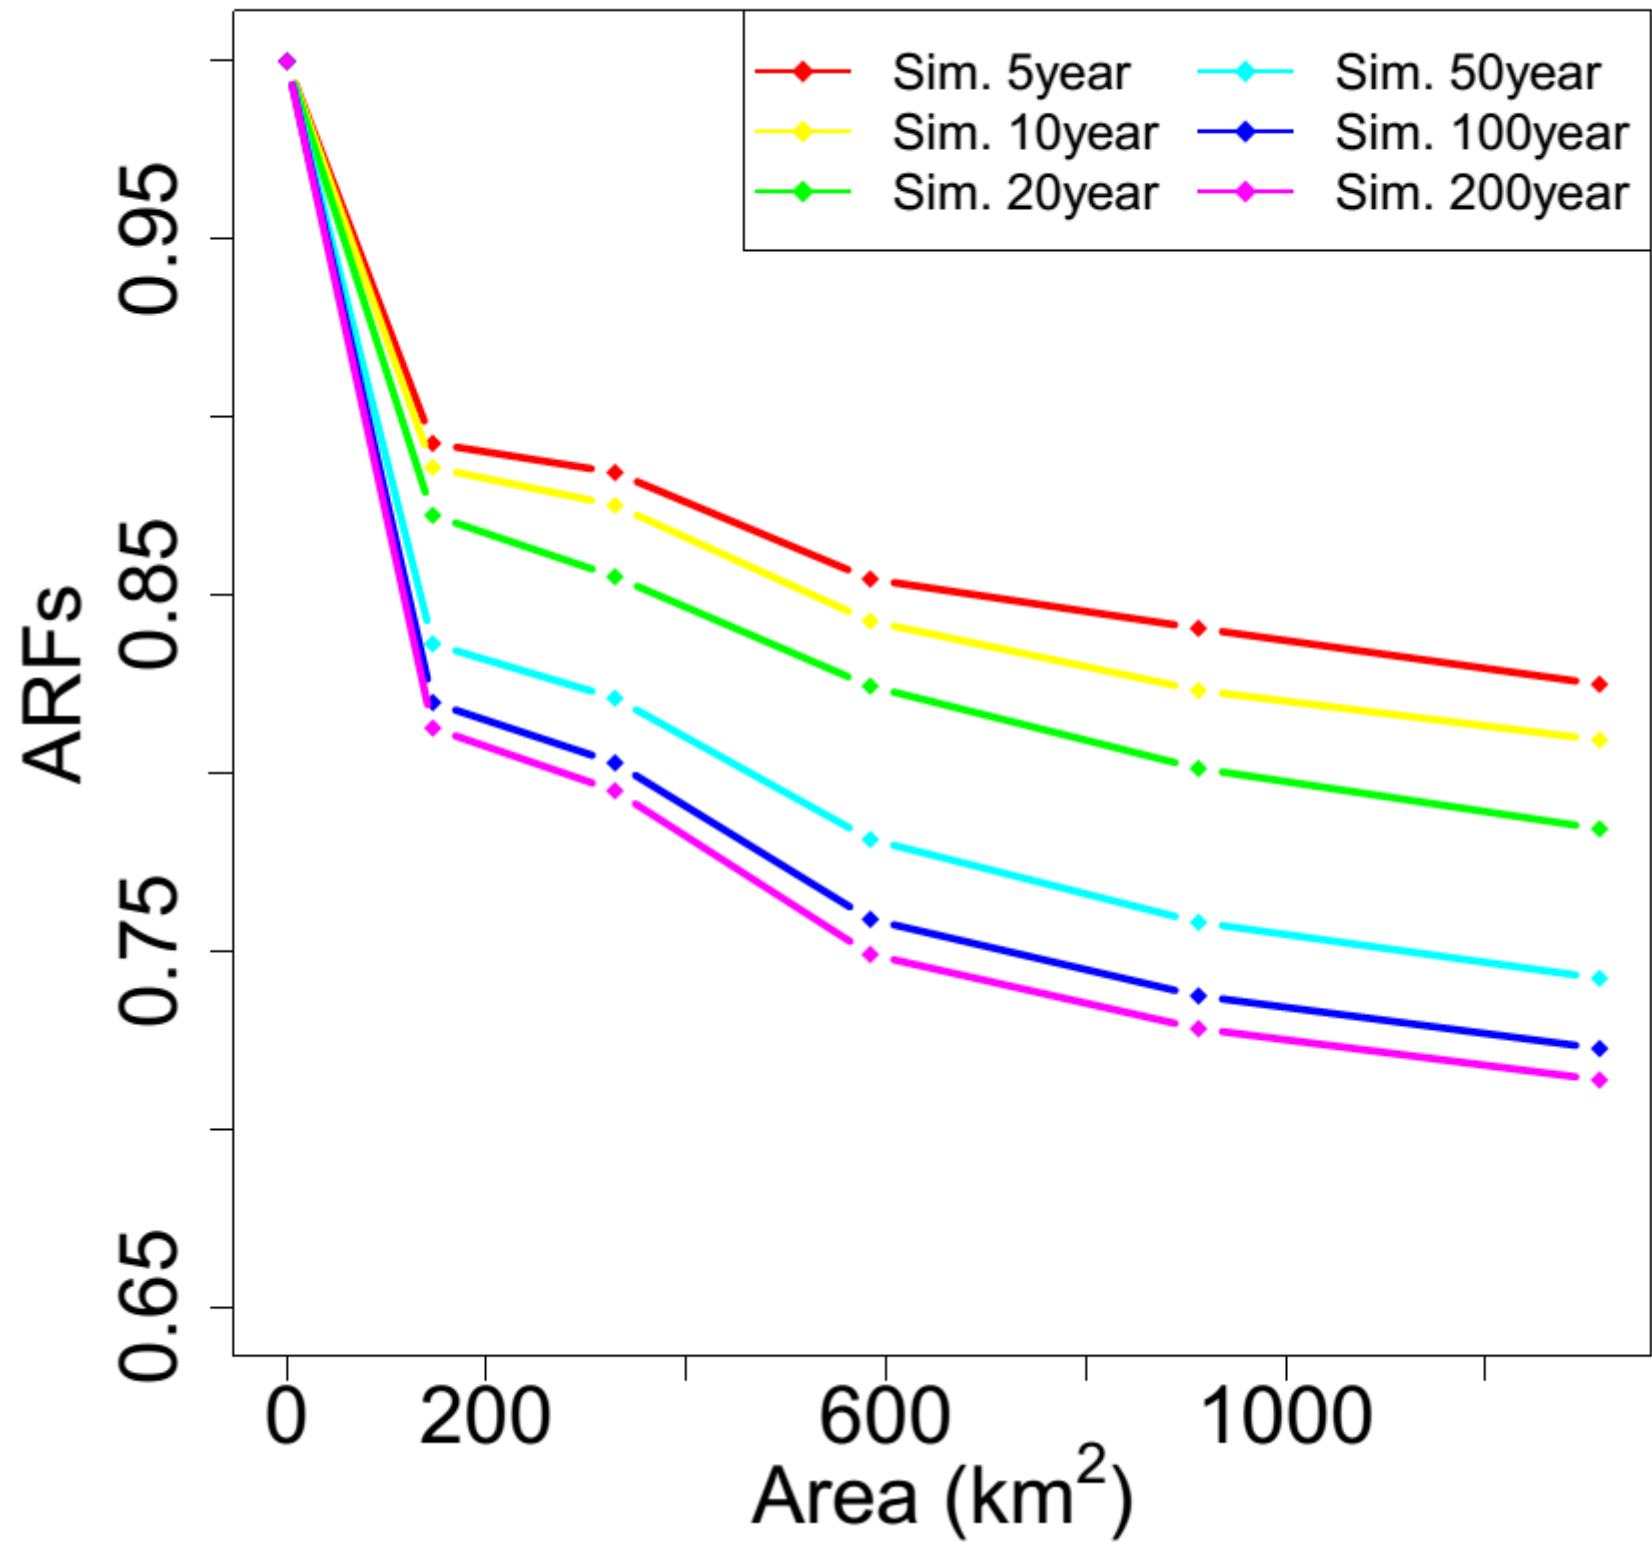

23  
24 **Fig. S1.** Simulated ARFs for spatial rainfall of 36 hr duration for different return periods.  
25

# Simulated ARFs for 9 hr rainfall

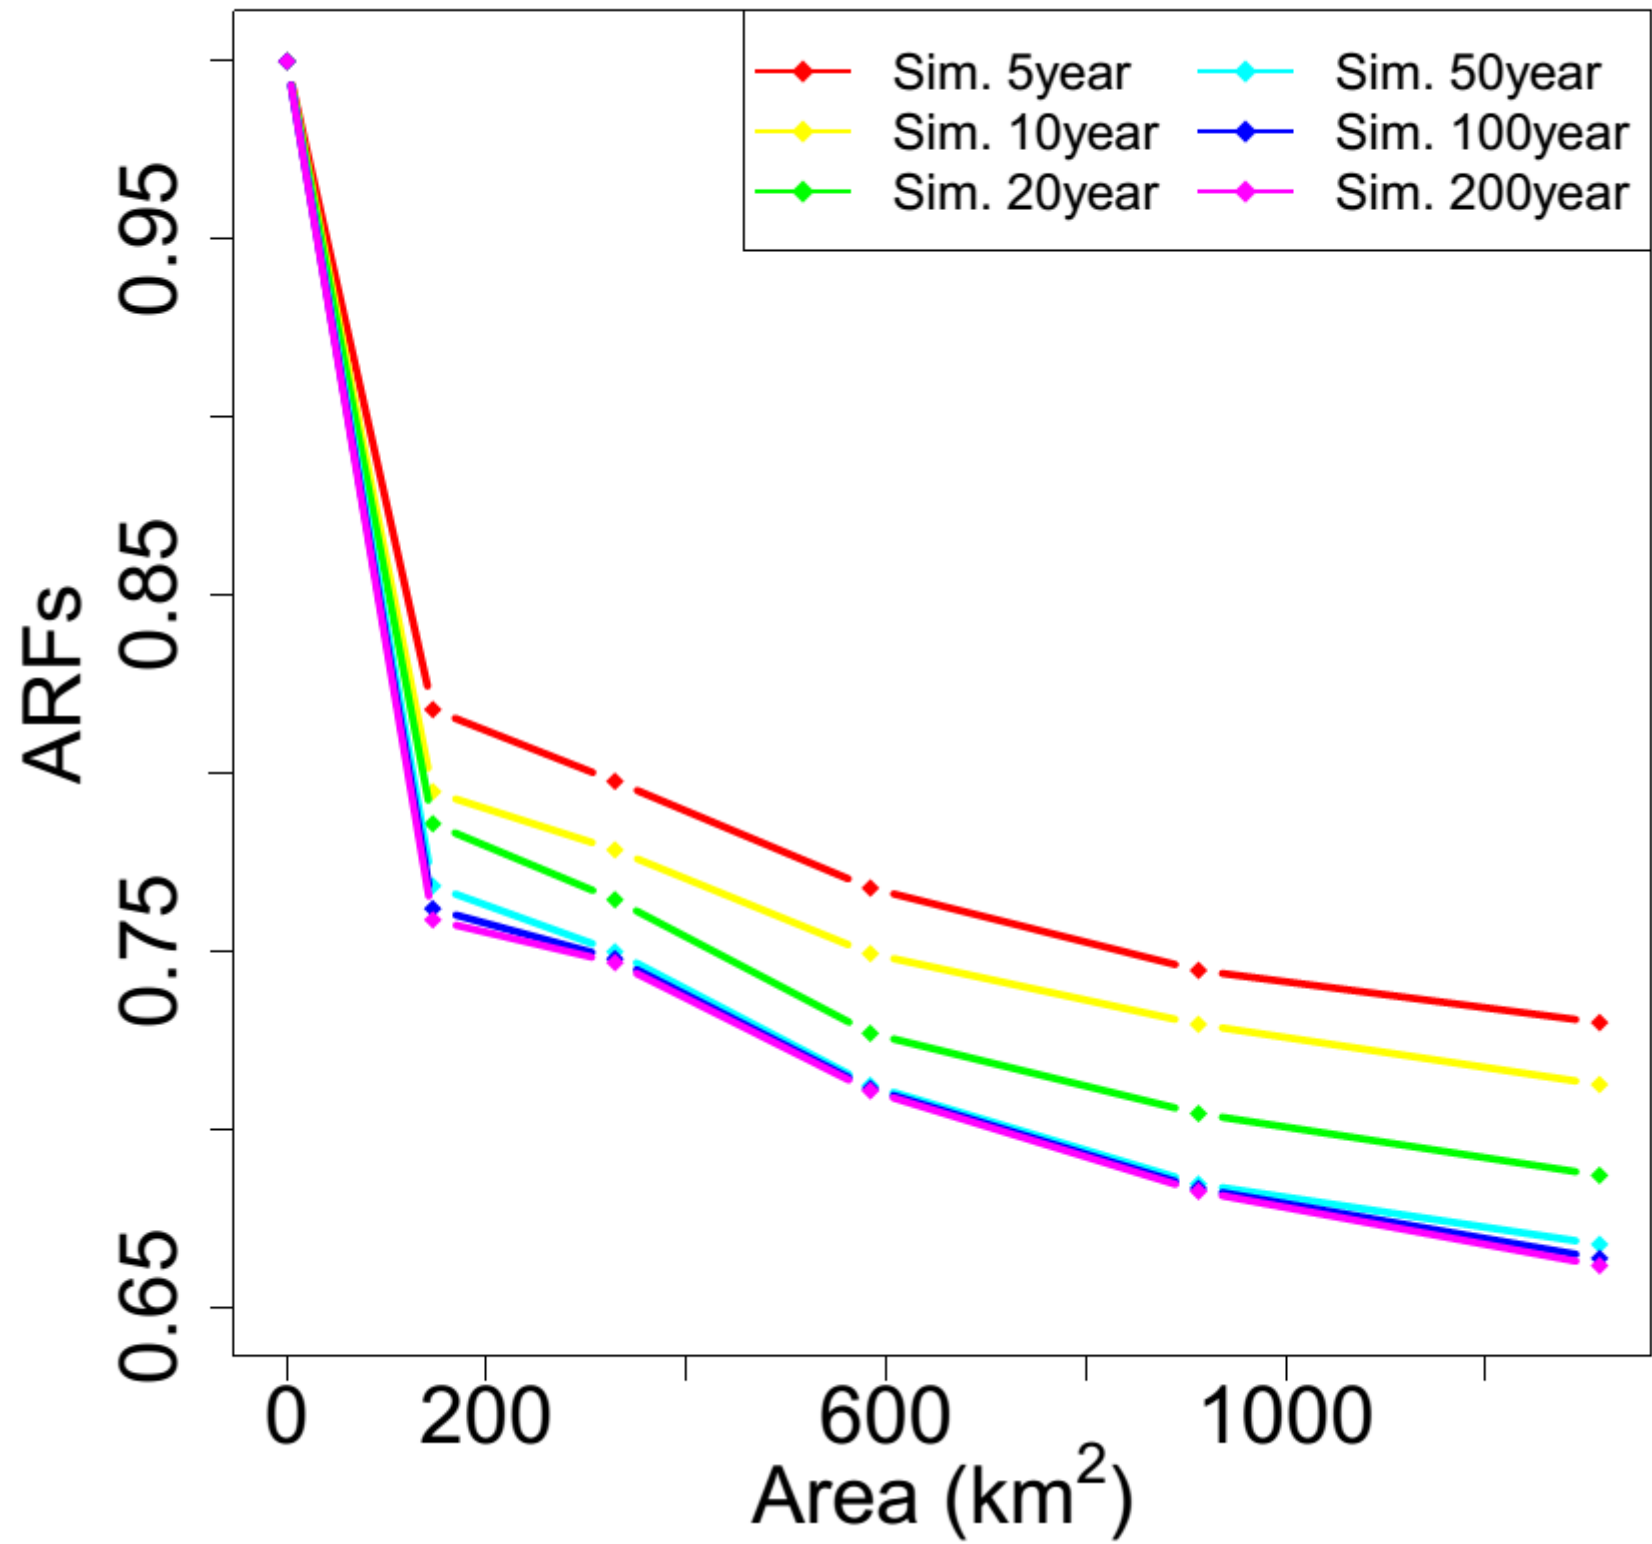

26  
27 **Fig. S2.** Simulated ARFs for spatial rainfall of 9 hr duration for different return periods.  
28

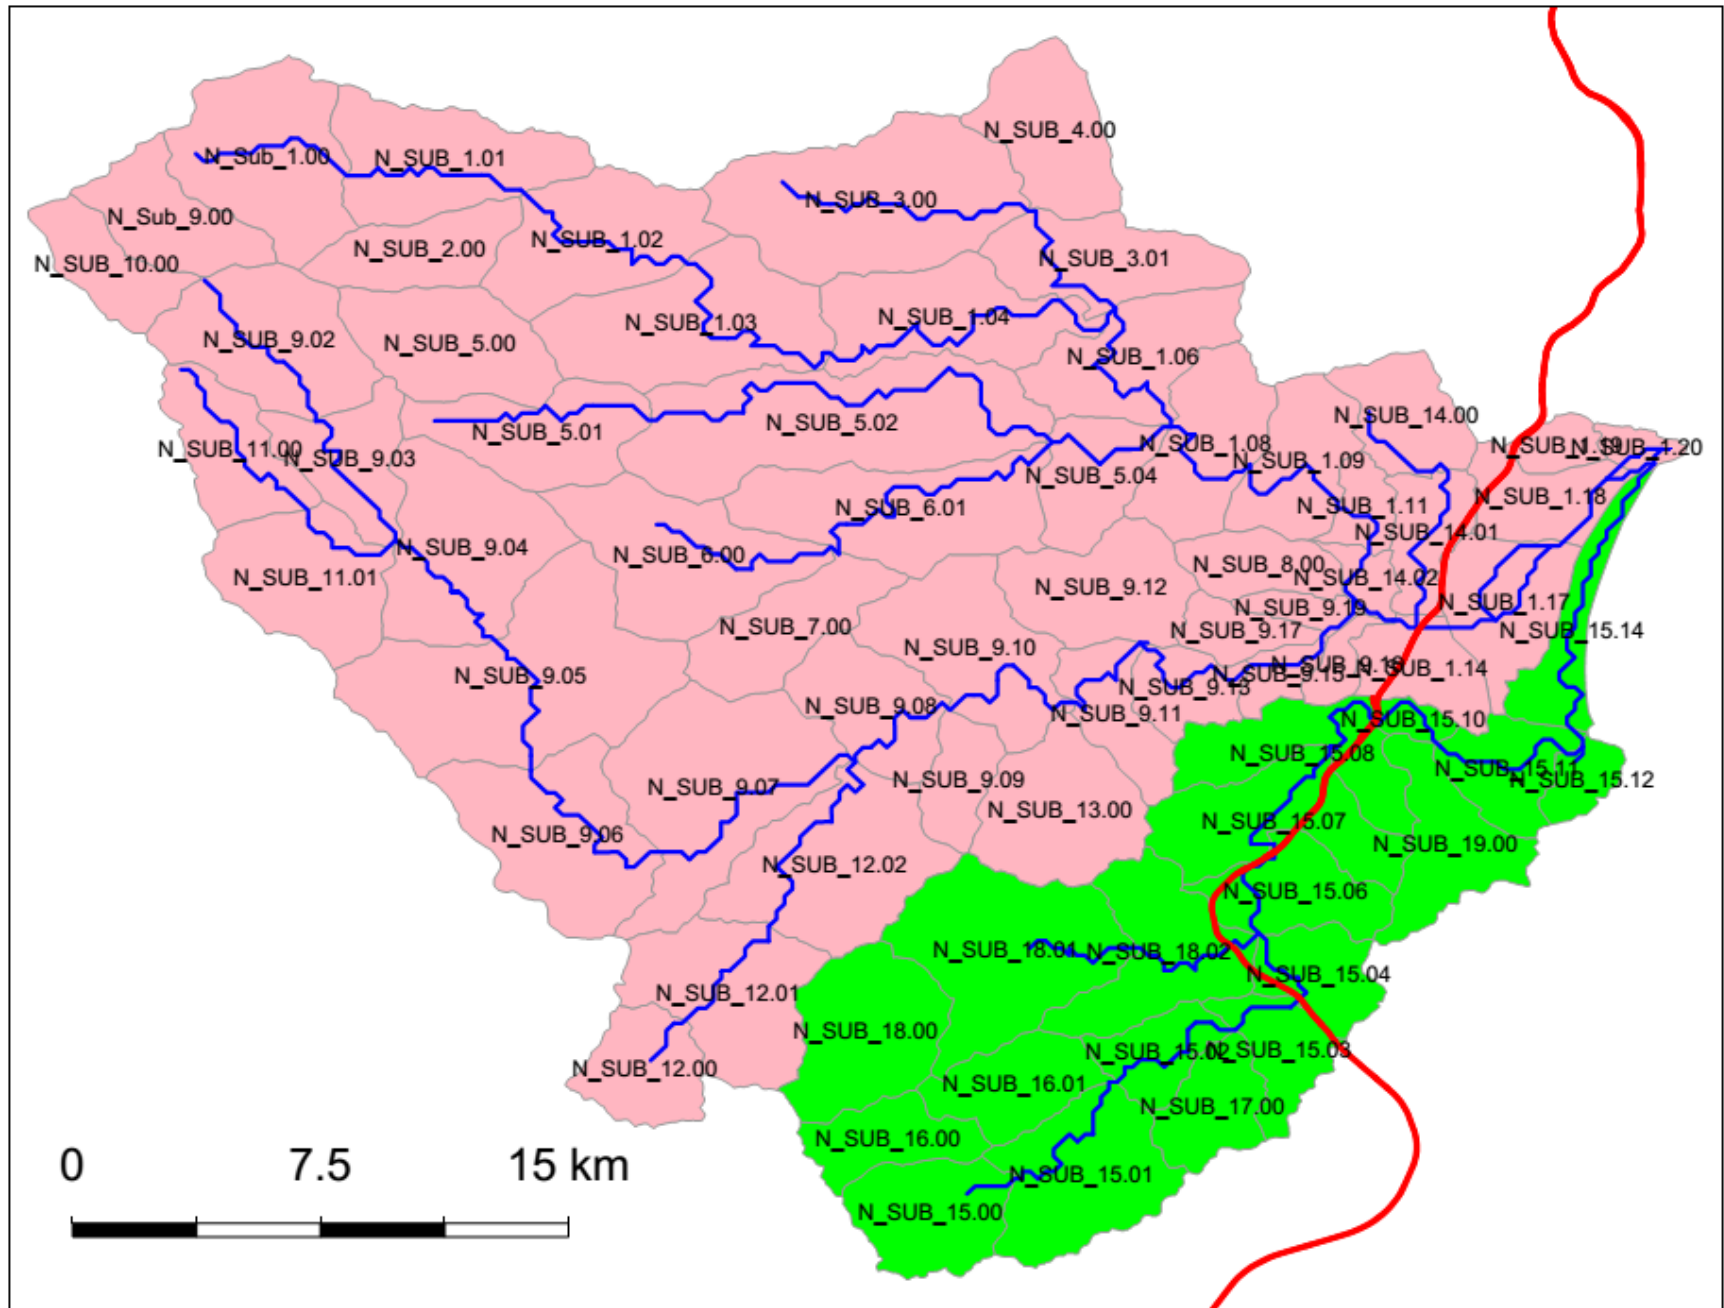

29  
 30 **Fig. S3.** Hydrological model layout for Nambucca (upper) catchment and Warrell Creek catchment. The blue lines are the river network, and the red  
 31 line is the Pacific Highway upgrade project.  
 32



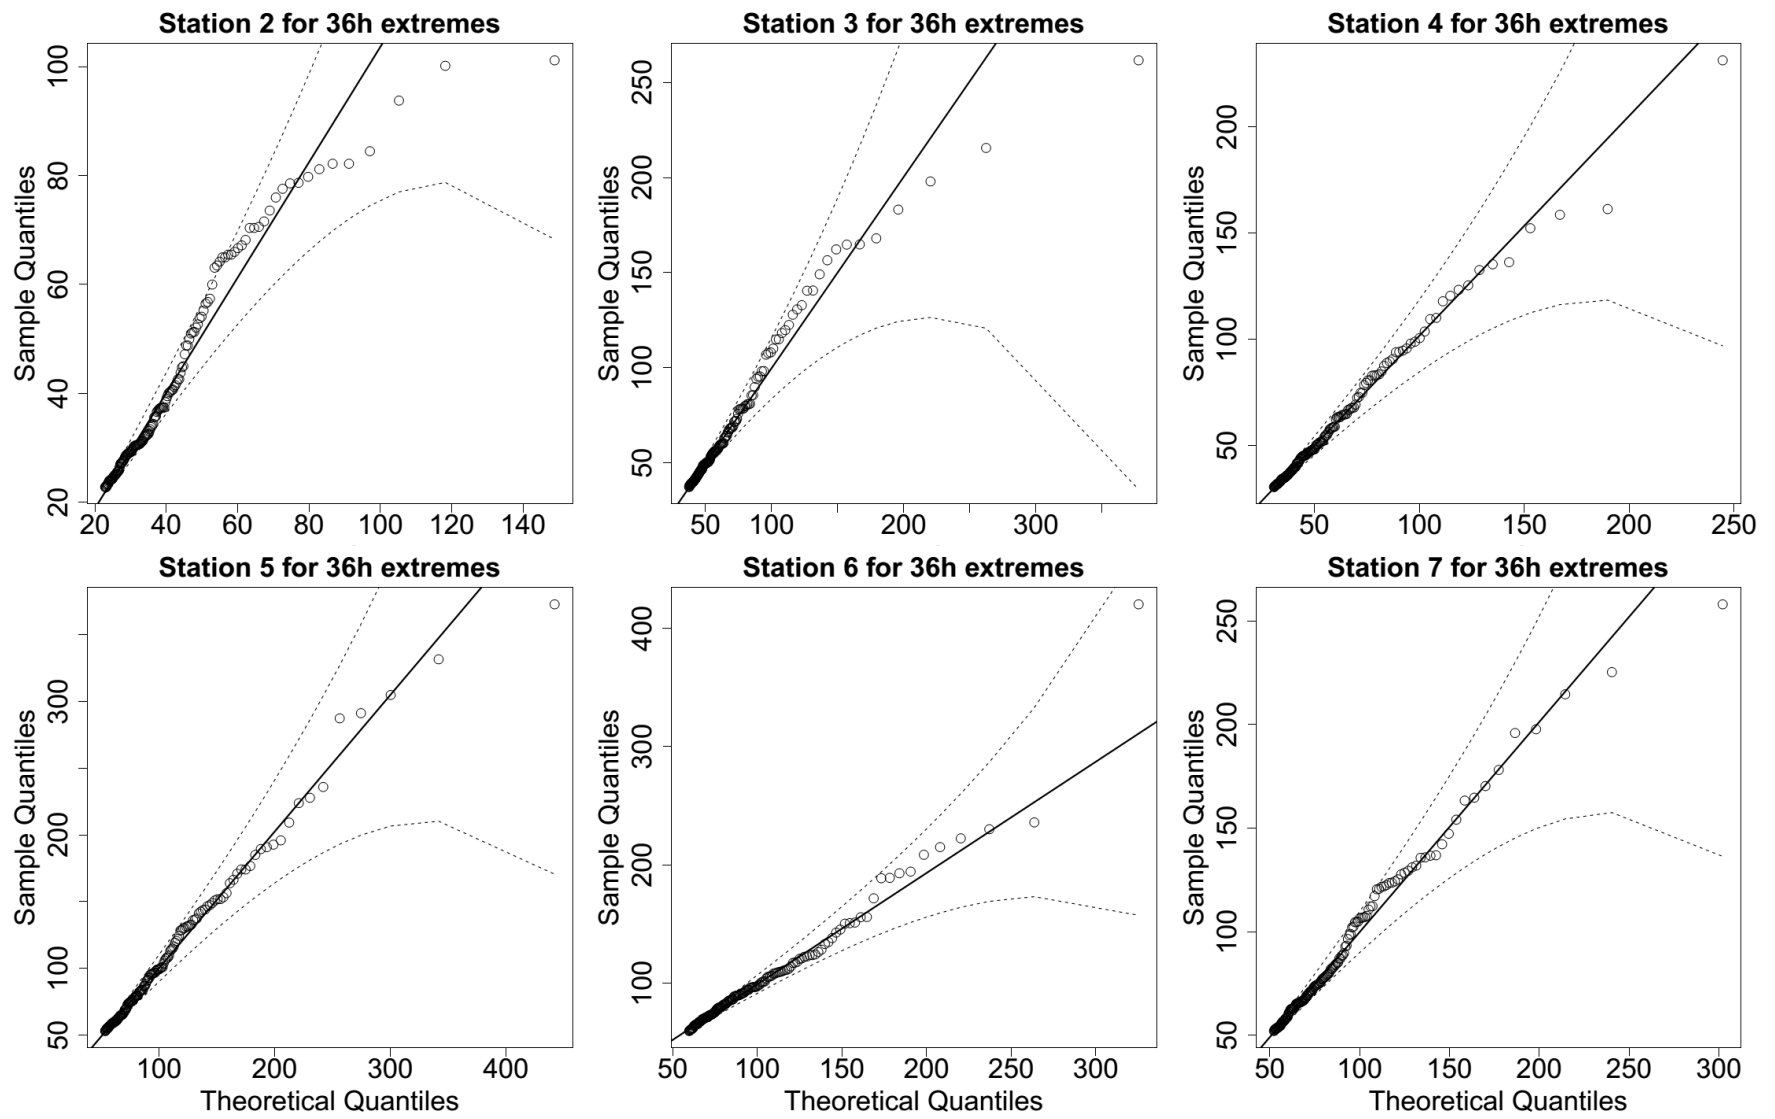

37

38

39 **Fig. S5.** QQ plots for the estimate of marginal distribution GPD for 36 hr rainfall extremes for rain gauges from 2 to 7. The solid diagonal line  
 40 indicates a perfect fit, and the dotted lines indicate a 95% confidence interval.

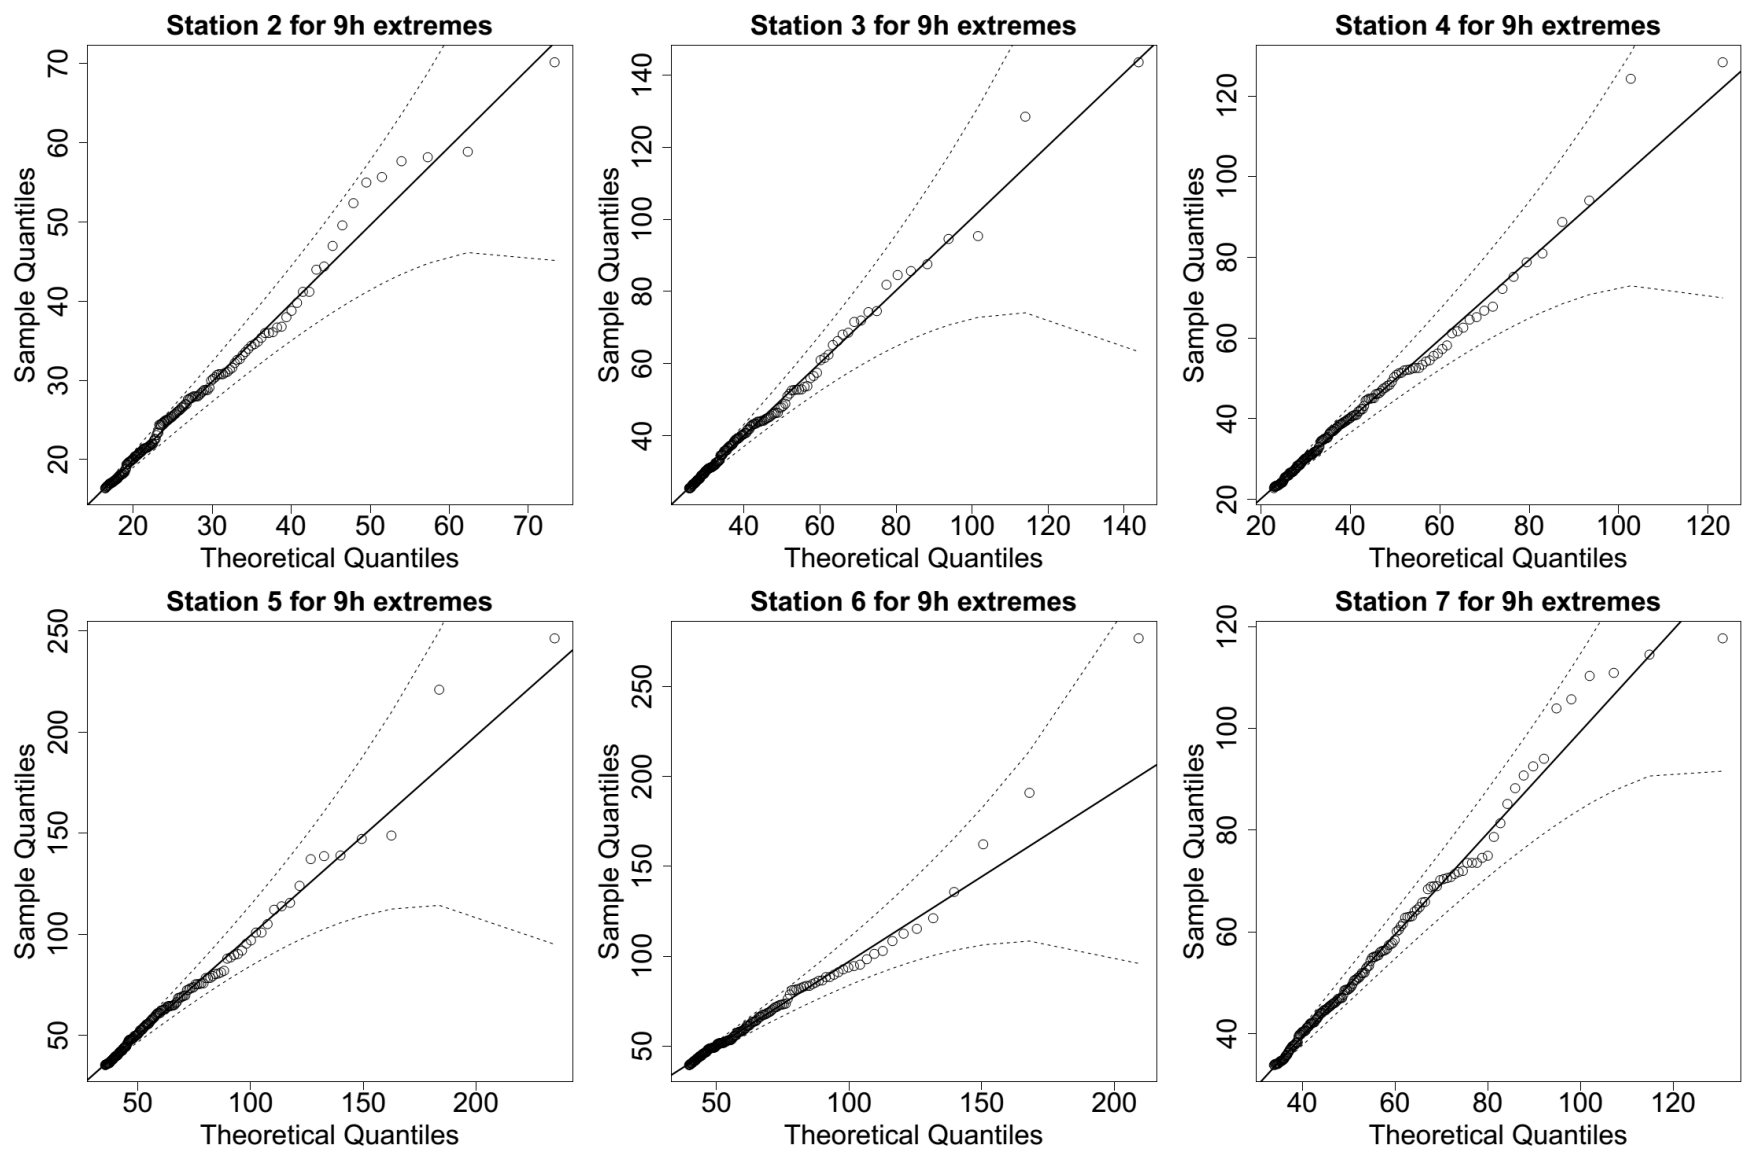

41

42

43 **Fig. S6.** QQ plots for the estimate of marginal distribution GPD for 9 hr rainfall extremes for rain gauges from 2 to 7. The solid diagonal line  
 44 indicates a perfect fit, and the dotted lines indicate a 95% confidence interval.

45

46
